# Supplementary material for: Transient endoreplication down-regulates the kinesin-14 HSET and contributes to genomic instability
Source: PubMed Central journal article supplement — Mol Biol Cell. 2016 Oct 1;27(19):2911–23. doi: 10.1091/mbc.E16-03-0159 (PMC5042578; doi:10.1091/mbc.e16-03-0159), 2016-10-01

# Supplemental Materials

*Molecular Biology of the Cell*

Chen et al.

## Figure Legends

**Supplementary Figure 1.** The concentration of RO3306 added to HeLa cells alters endocycle vs. endomitosis. Cell fate profiles of HeLa cells exposed to the indicated treatment in which  $t=0$  corresponds to the time of drug addition.

**Supplementary Figure 2.** MDA-MB-231 cells behave similar to HeLa cells upon endoreplication. (A) Quantification of FACS data from three independent experiments showing the percentage of MDA-MB-231 cells with different ploidy under the indicated treatments. For each experiment, 10,000 cells were measured for DNA content, and the mean  $\pm$  standard deviation (SD) is graphed. (B) (Left) Micrographs of MDA-MB-231 cells stained with Hoechst for DNA after the indicated treatment. Scale bar, 20  $\mu$ m. (Right) Dot plots showing the quantification of the nuclear size from three independent experiments in which at least 300 cells were scored per experiment. Bar and whiskers indicate the mean and SD. (C) Cell fate profile of MDA-MB-231 cells exposed to indicated treatment in which  $t=0$  corresponds to the time of drug addition. (D) DMSO control or SU6656 treated MDA-MB-231 cells were fixed at  $\sim 14$  h post-drug addition and processed for immunofluorescence to visualize MTs (green) and DNA (blue). Scale bar, 5  $\mu$ m. (E) Quantification of the percentage of mitotic cells at different mitotic stages. Data are mean  $\pm$  SD from three independent experiments in which 900 cells were scored per condition. \*  $p<0.05$ , \*\*  $p<0.01$ , \*\*\*  $p<0.001$ .

**Supplementary Figure 3.** HCT-116 and RPE-1 increase ploidy after iEC induction. (A, B) Quantification of FACS data from three independent experiments showing the percentage of HCT-116 cells at 48 h (A) and RPE-1 cells at 72 h (B) with different ploidy under the indicated treatments. For each experiment, 10,000 cells were measured for DNA content, and the mean  $\pm$  SD is graphed. \*\*  $p<0.01$ , \*\*\*  $p<0.001$ .

**Supplementary Figure 4.** Cells overexpressing GFP-HSET return to mitosis after drug washout. (A) Western blot of HeLa cells treated with the indicated conditions and probed with anti-HSET (top) or anti-tubulin (bottom) antibodies. (B) Representative images of HeLa cells overexpressing GFP-HSET after SU6656 washout ( $t=0$ ). Time post-washout is marked in the upper left corner of each panel. The orange arrow represents one cell that divides into two cells (yellow and red arrows). Scale Bar, 20  $\mu$ m. (C) HeLa cells were synchronized, treated with SU6656 for 48 h and then imaged at 5 min intervals starting from 7 to 16 h post drug washout. A total of 1500 cells were analyzed of which 749 entered mitosis. The number in parentheses represents the total number of mitotic cells with the indicated cell fate. (D, E) GFP-HSET overexpressing HeLa cells were synchronized, treated with DMSO (D), or SU6656 (E) for 48 h and

cultured in drug-free media for 20 h. Cells were then fixed and stained with probes specific for centromeric satellite DNA of chromosome 2 or 7 and stained with Hoechst to visualize DNA. Scale bar, 20  $\mu\text{m}$ .

# HeLa

6  $\mu$ M RO3306

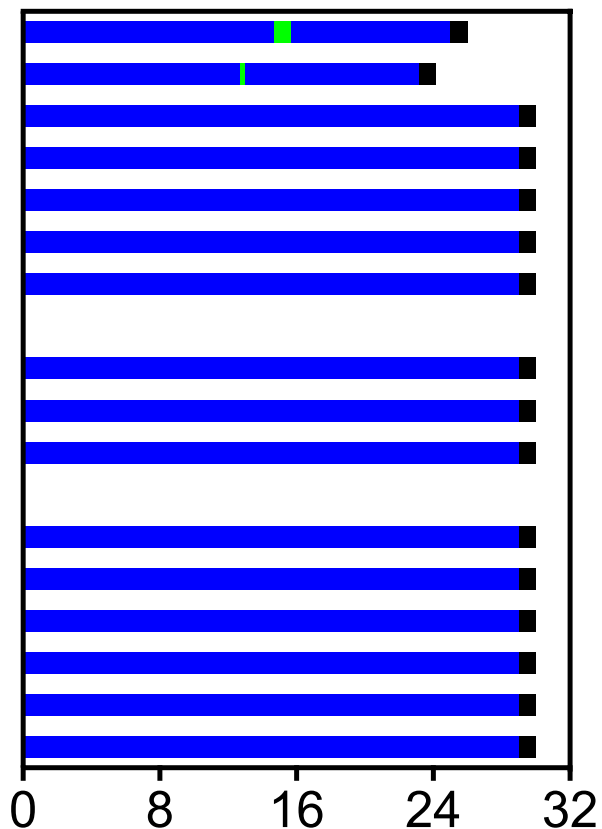

3  $\mu$ M RO3306

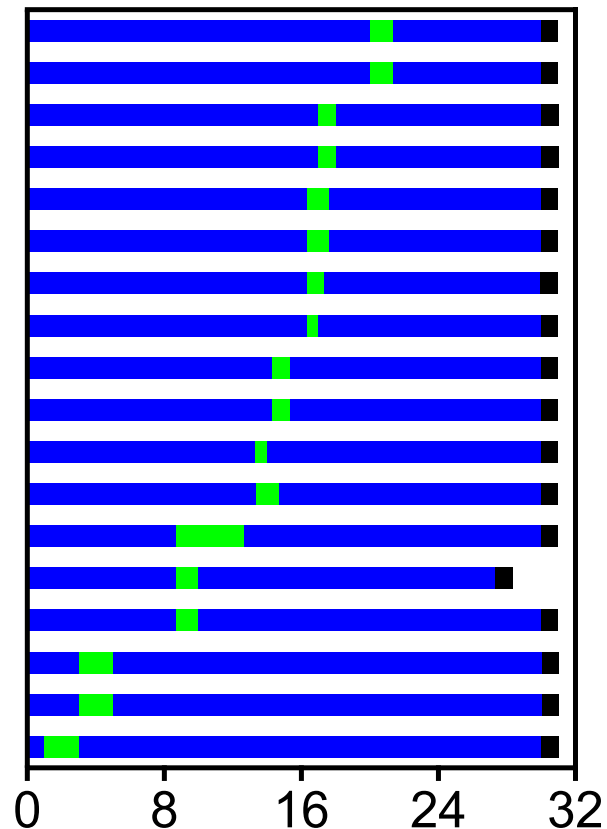

Time (h)

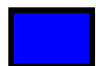

Flat

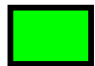

Round

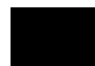

Exp. termination

**A**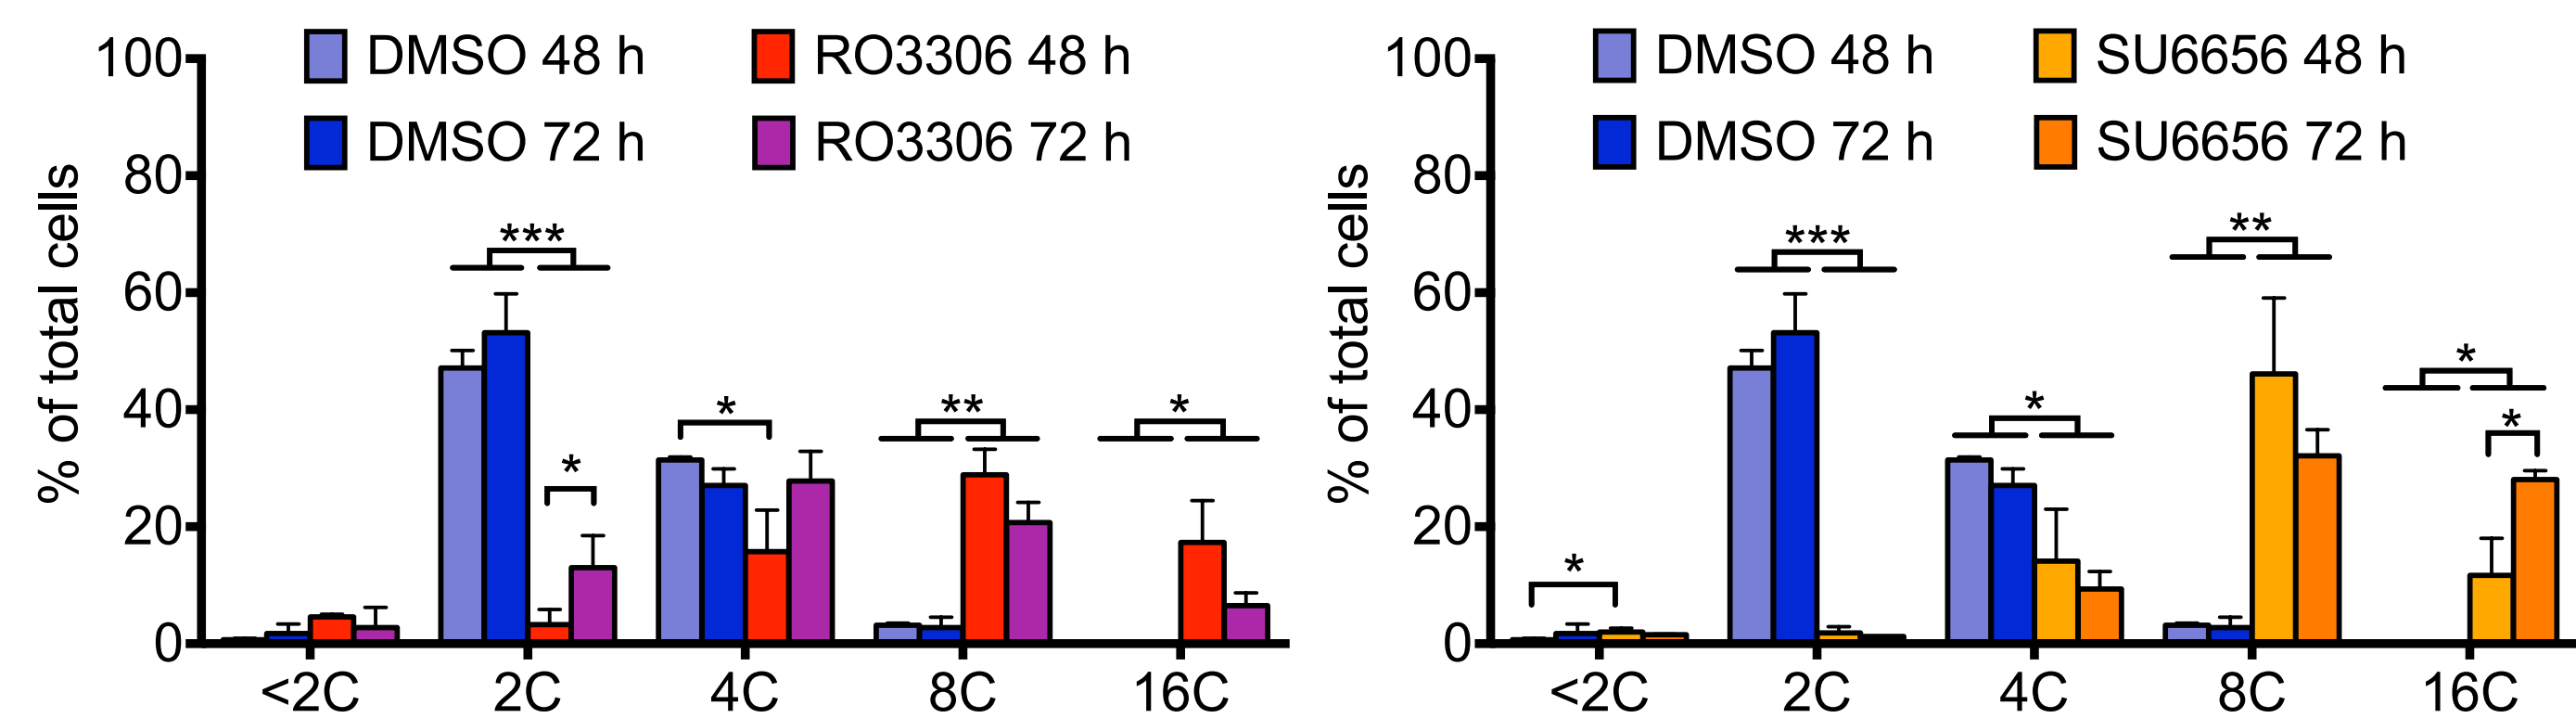**B**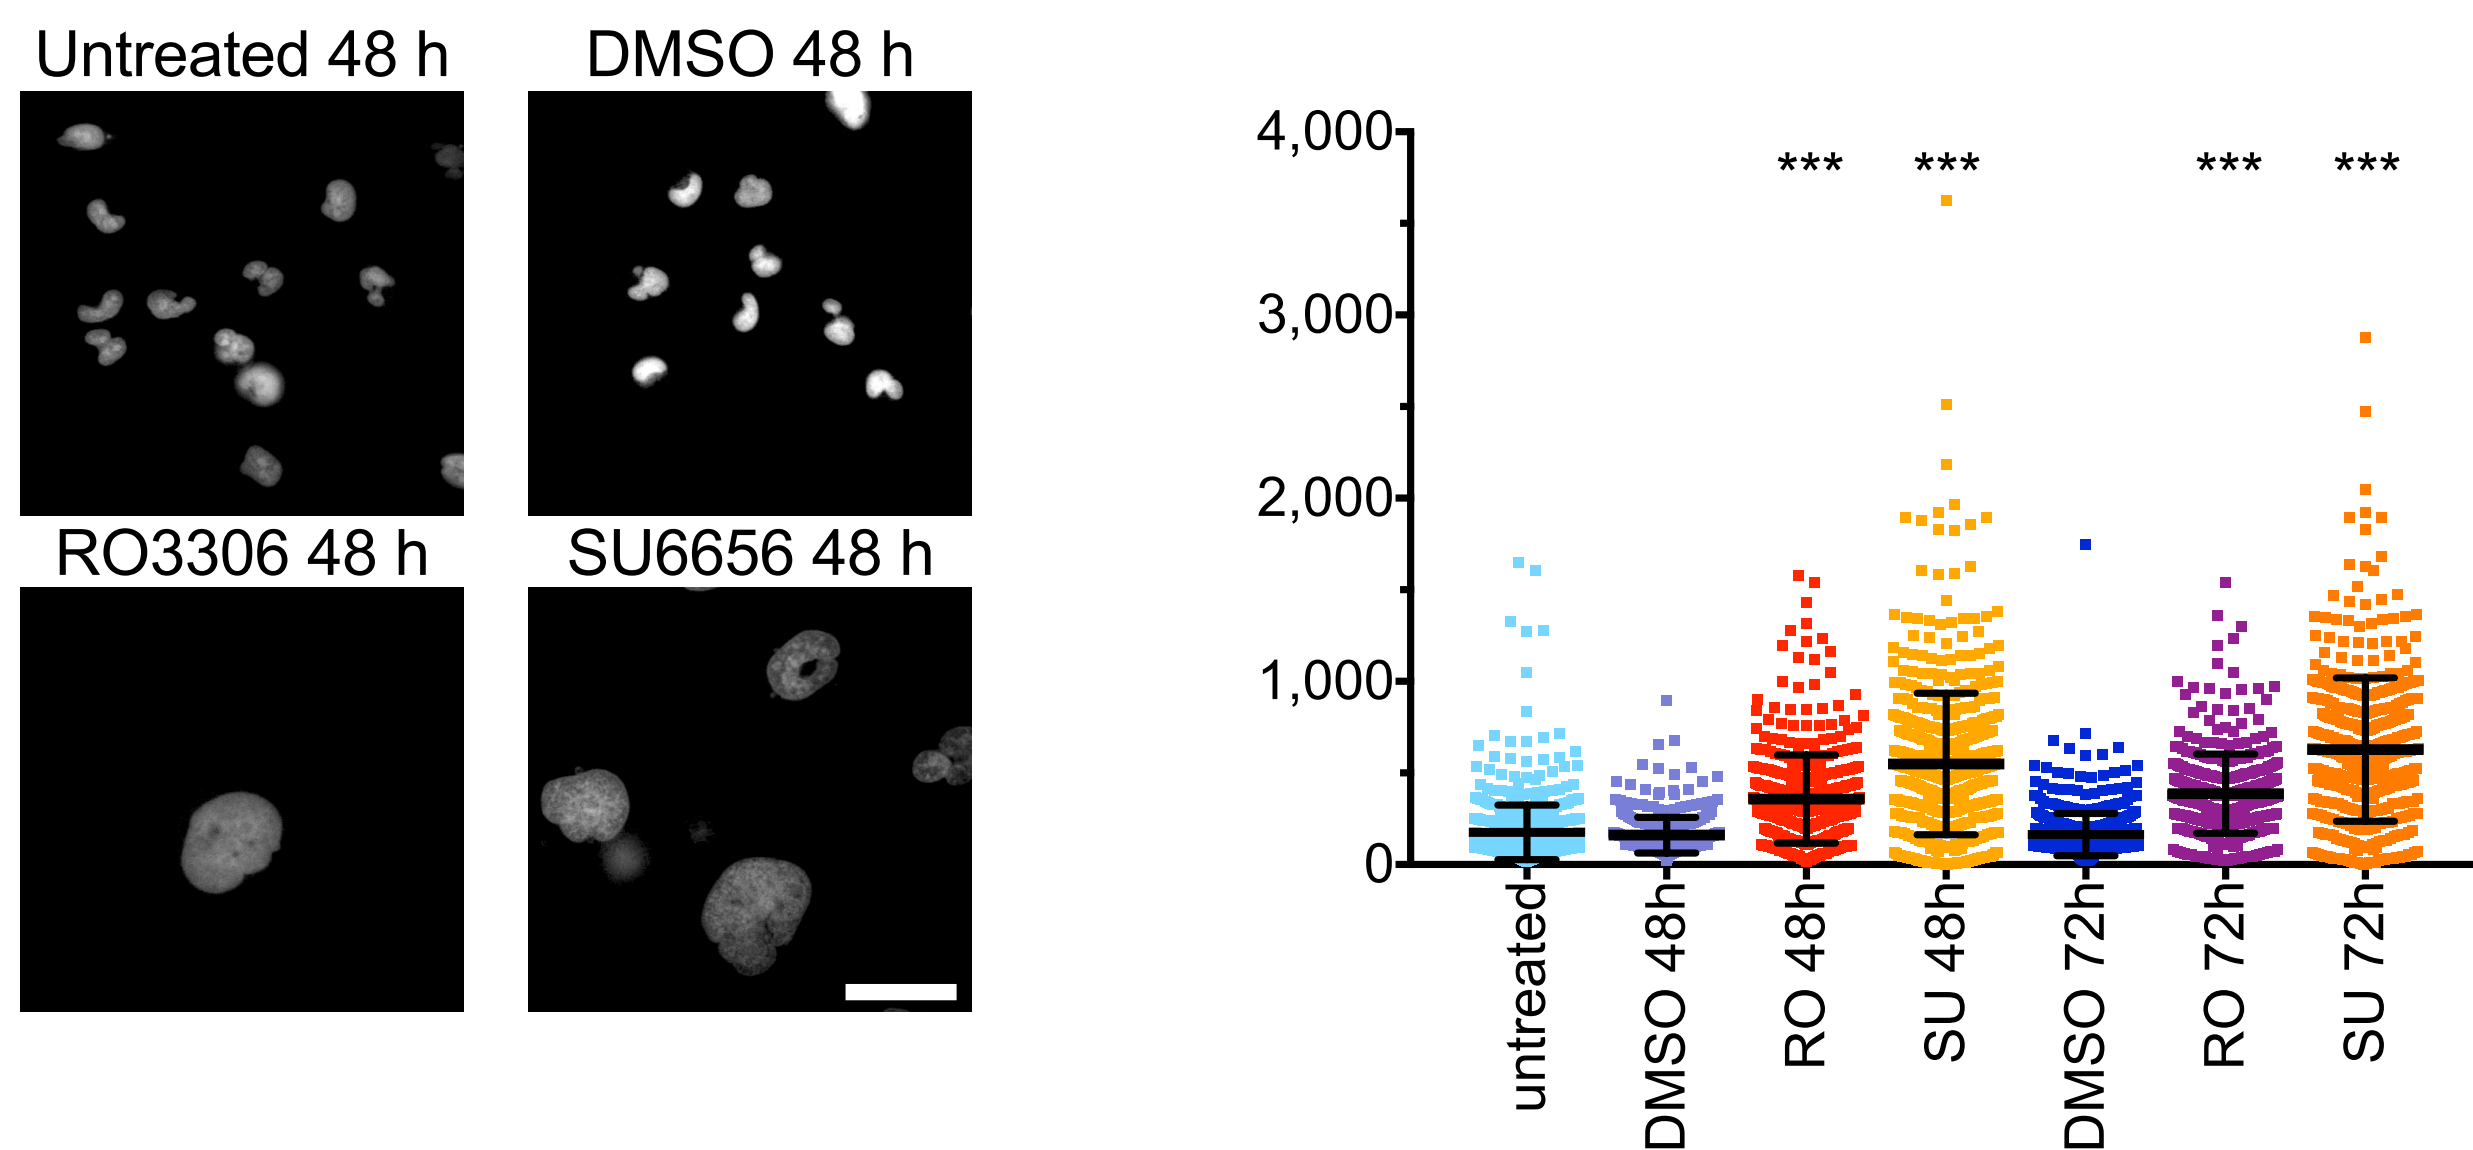**C**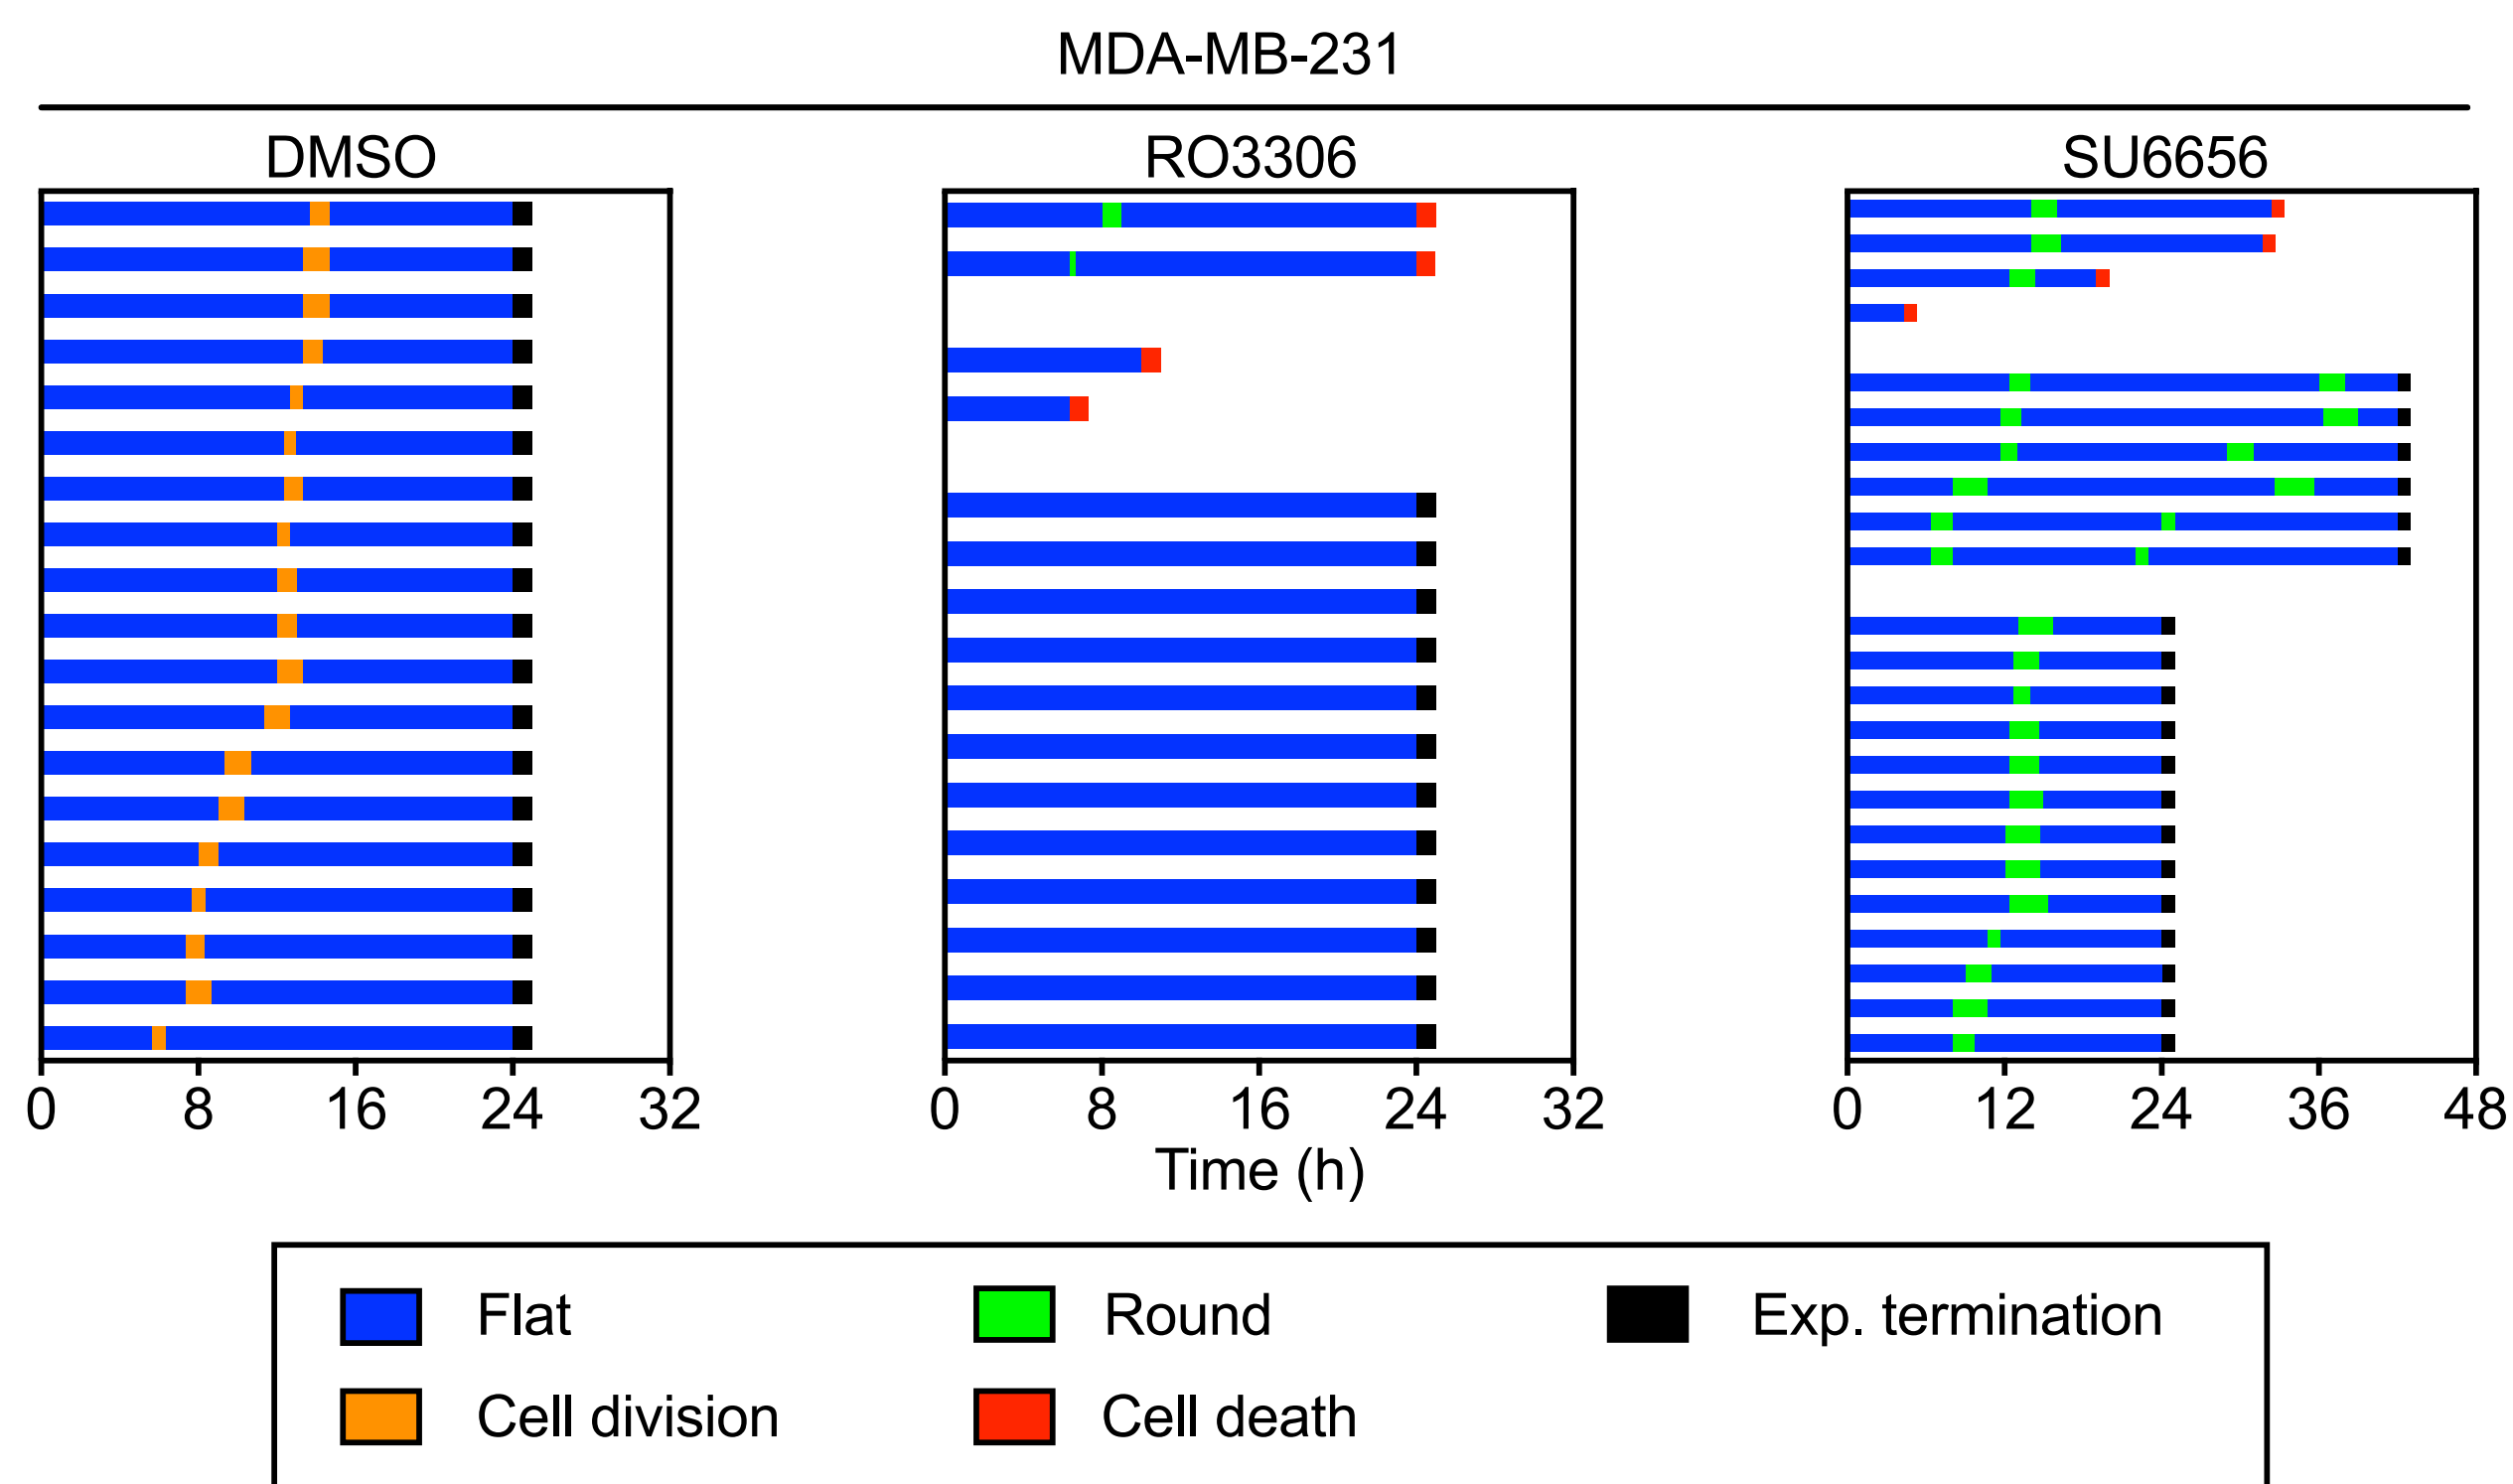**D**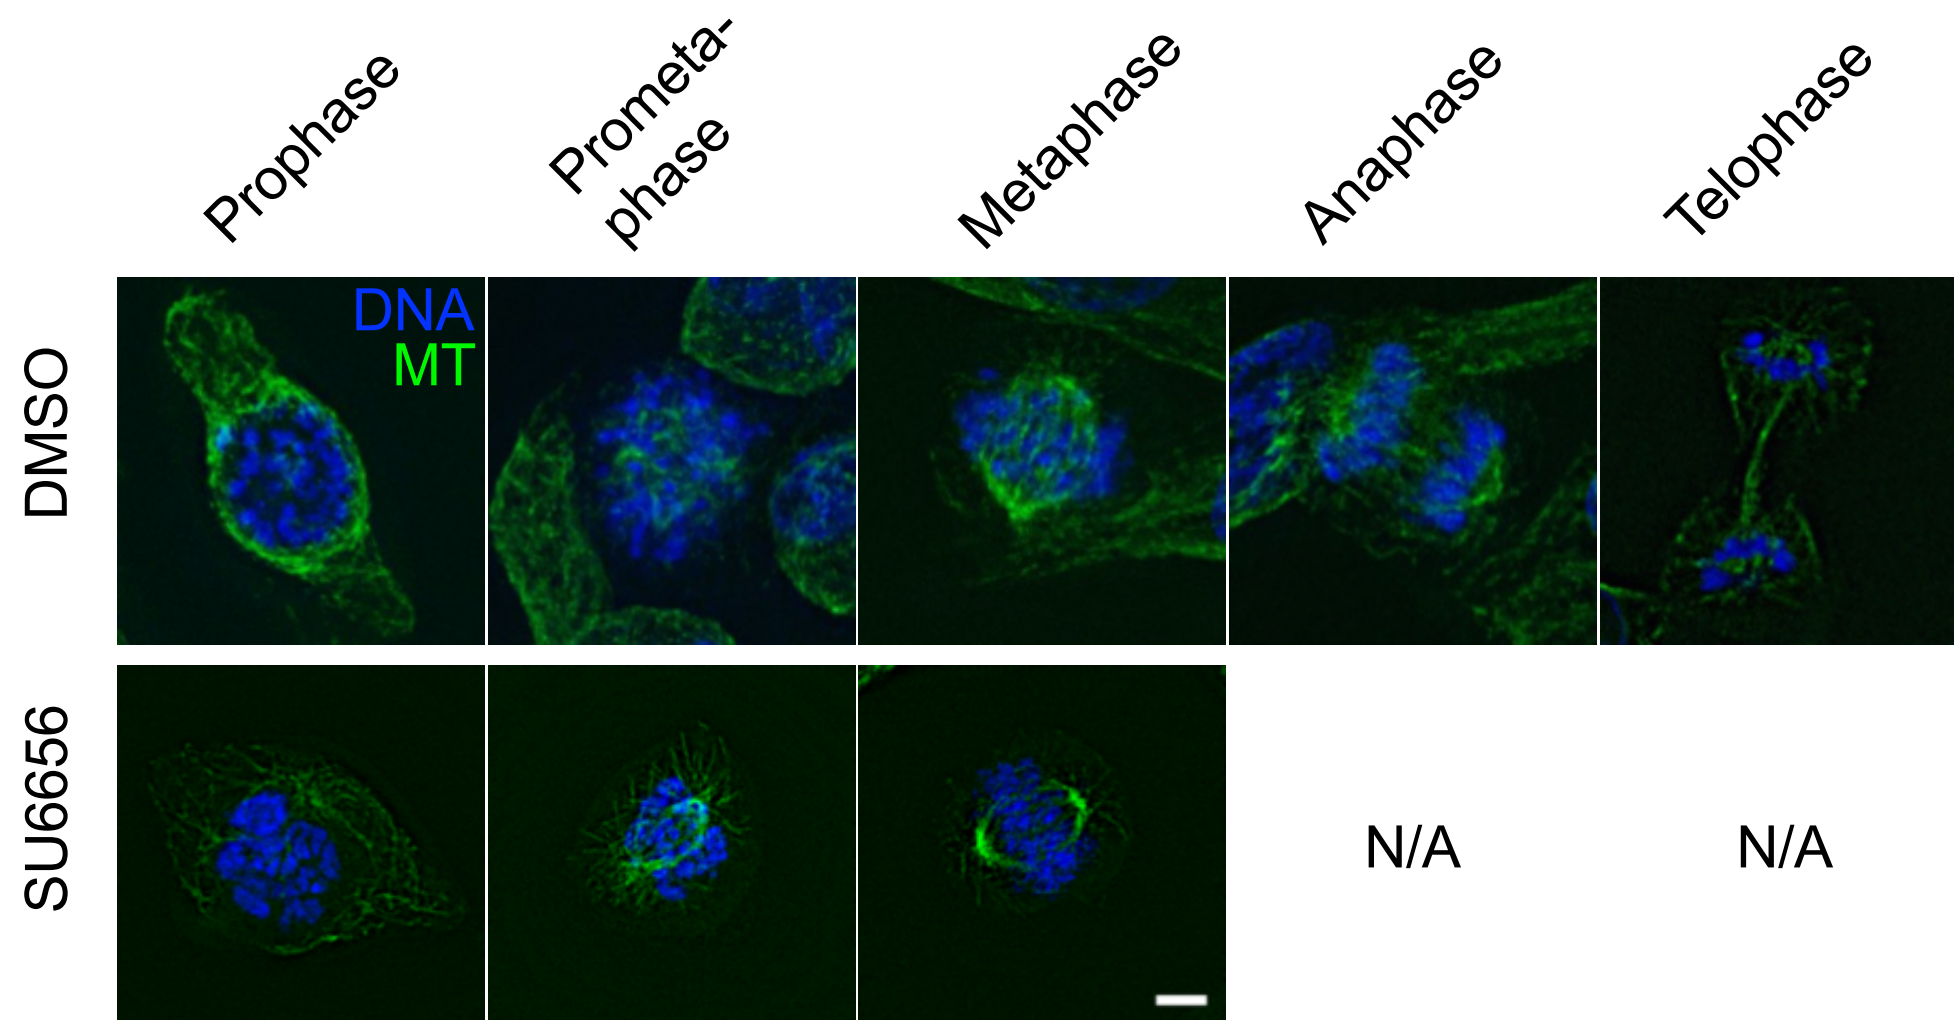**E**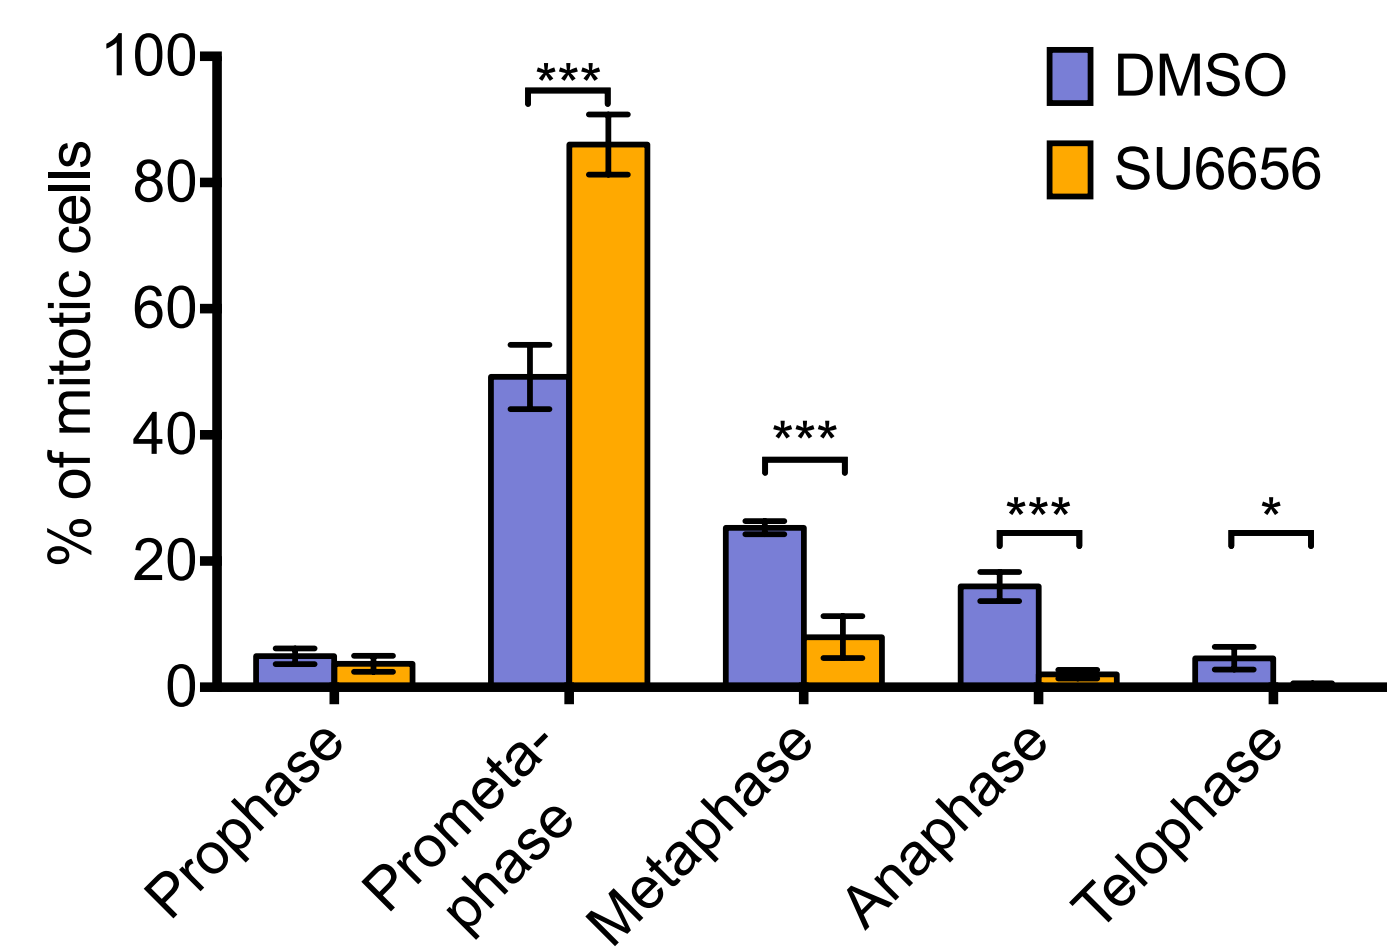

**A****HCT-116**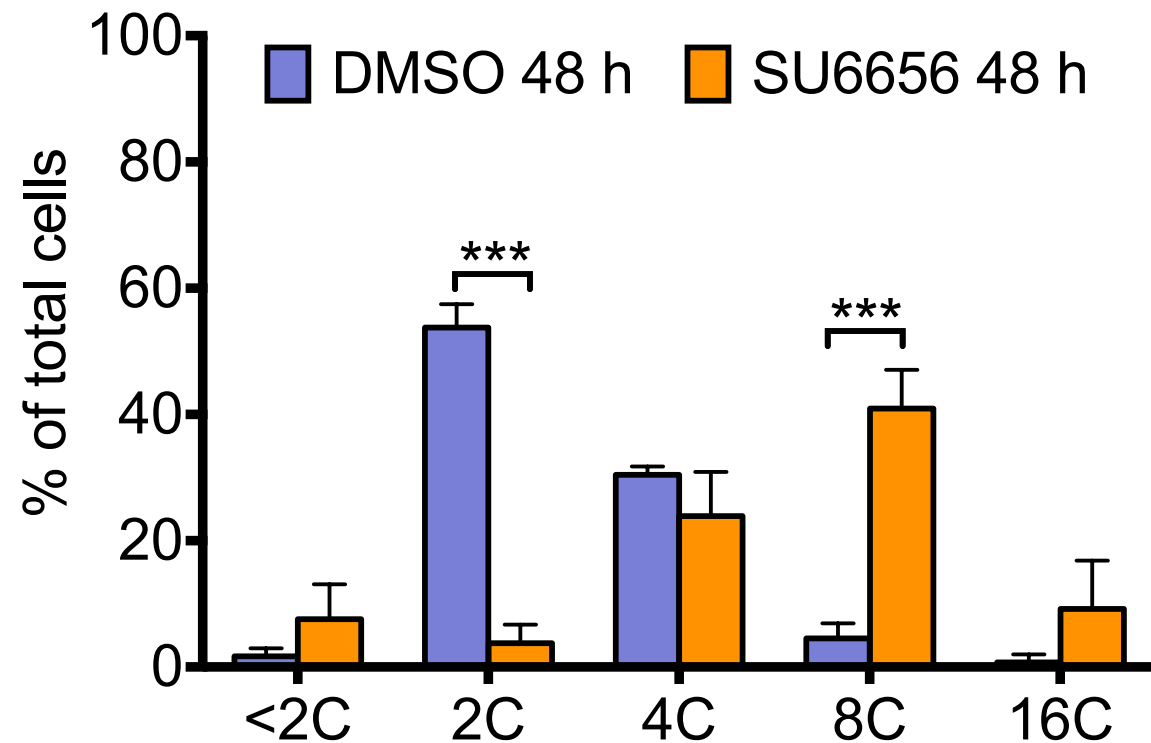**B****RPE-1**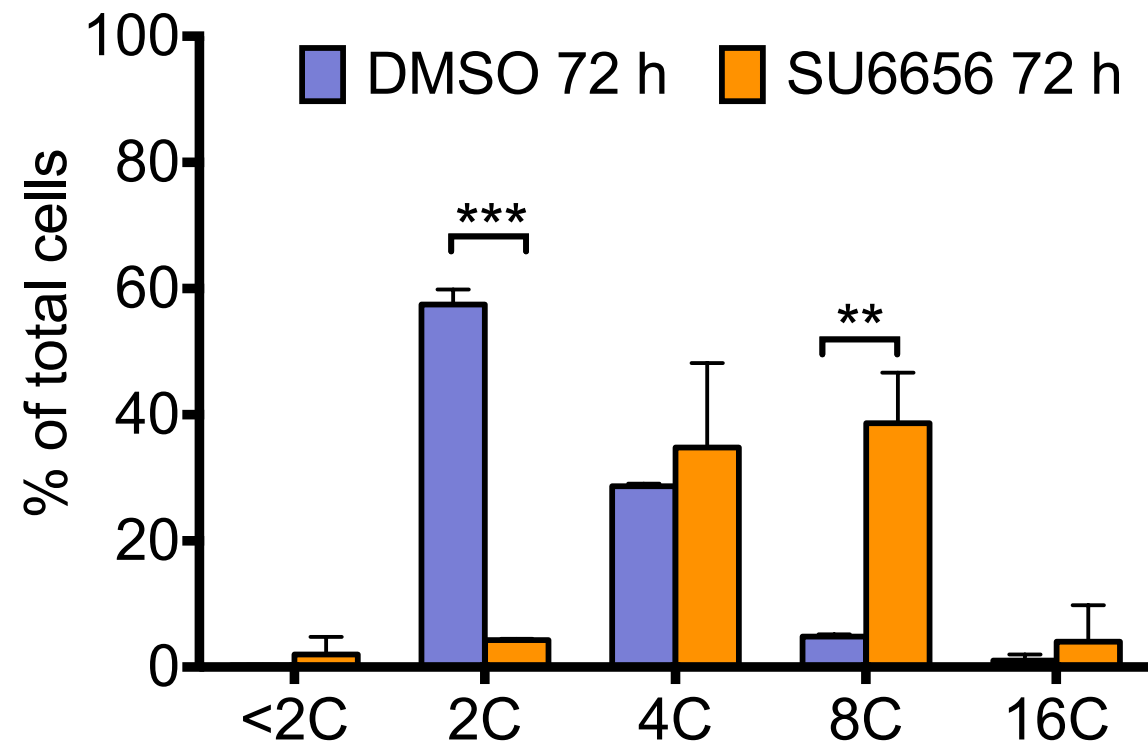

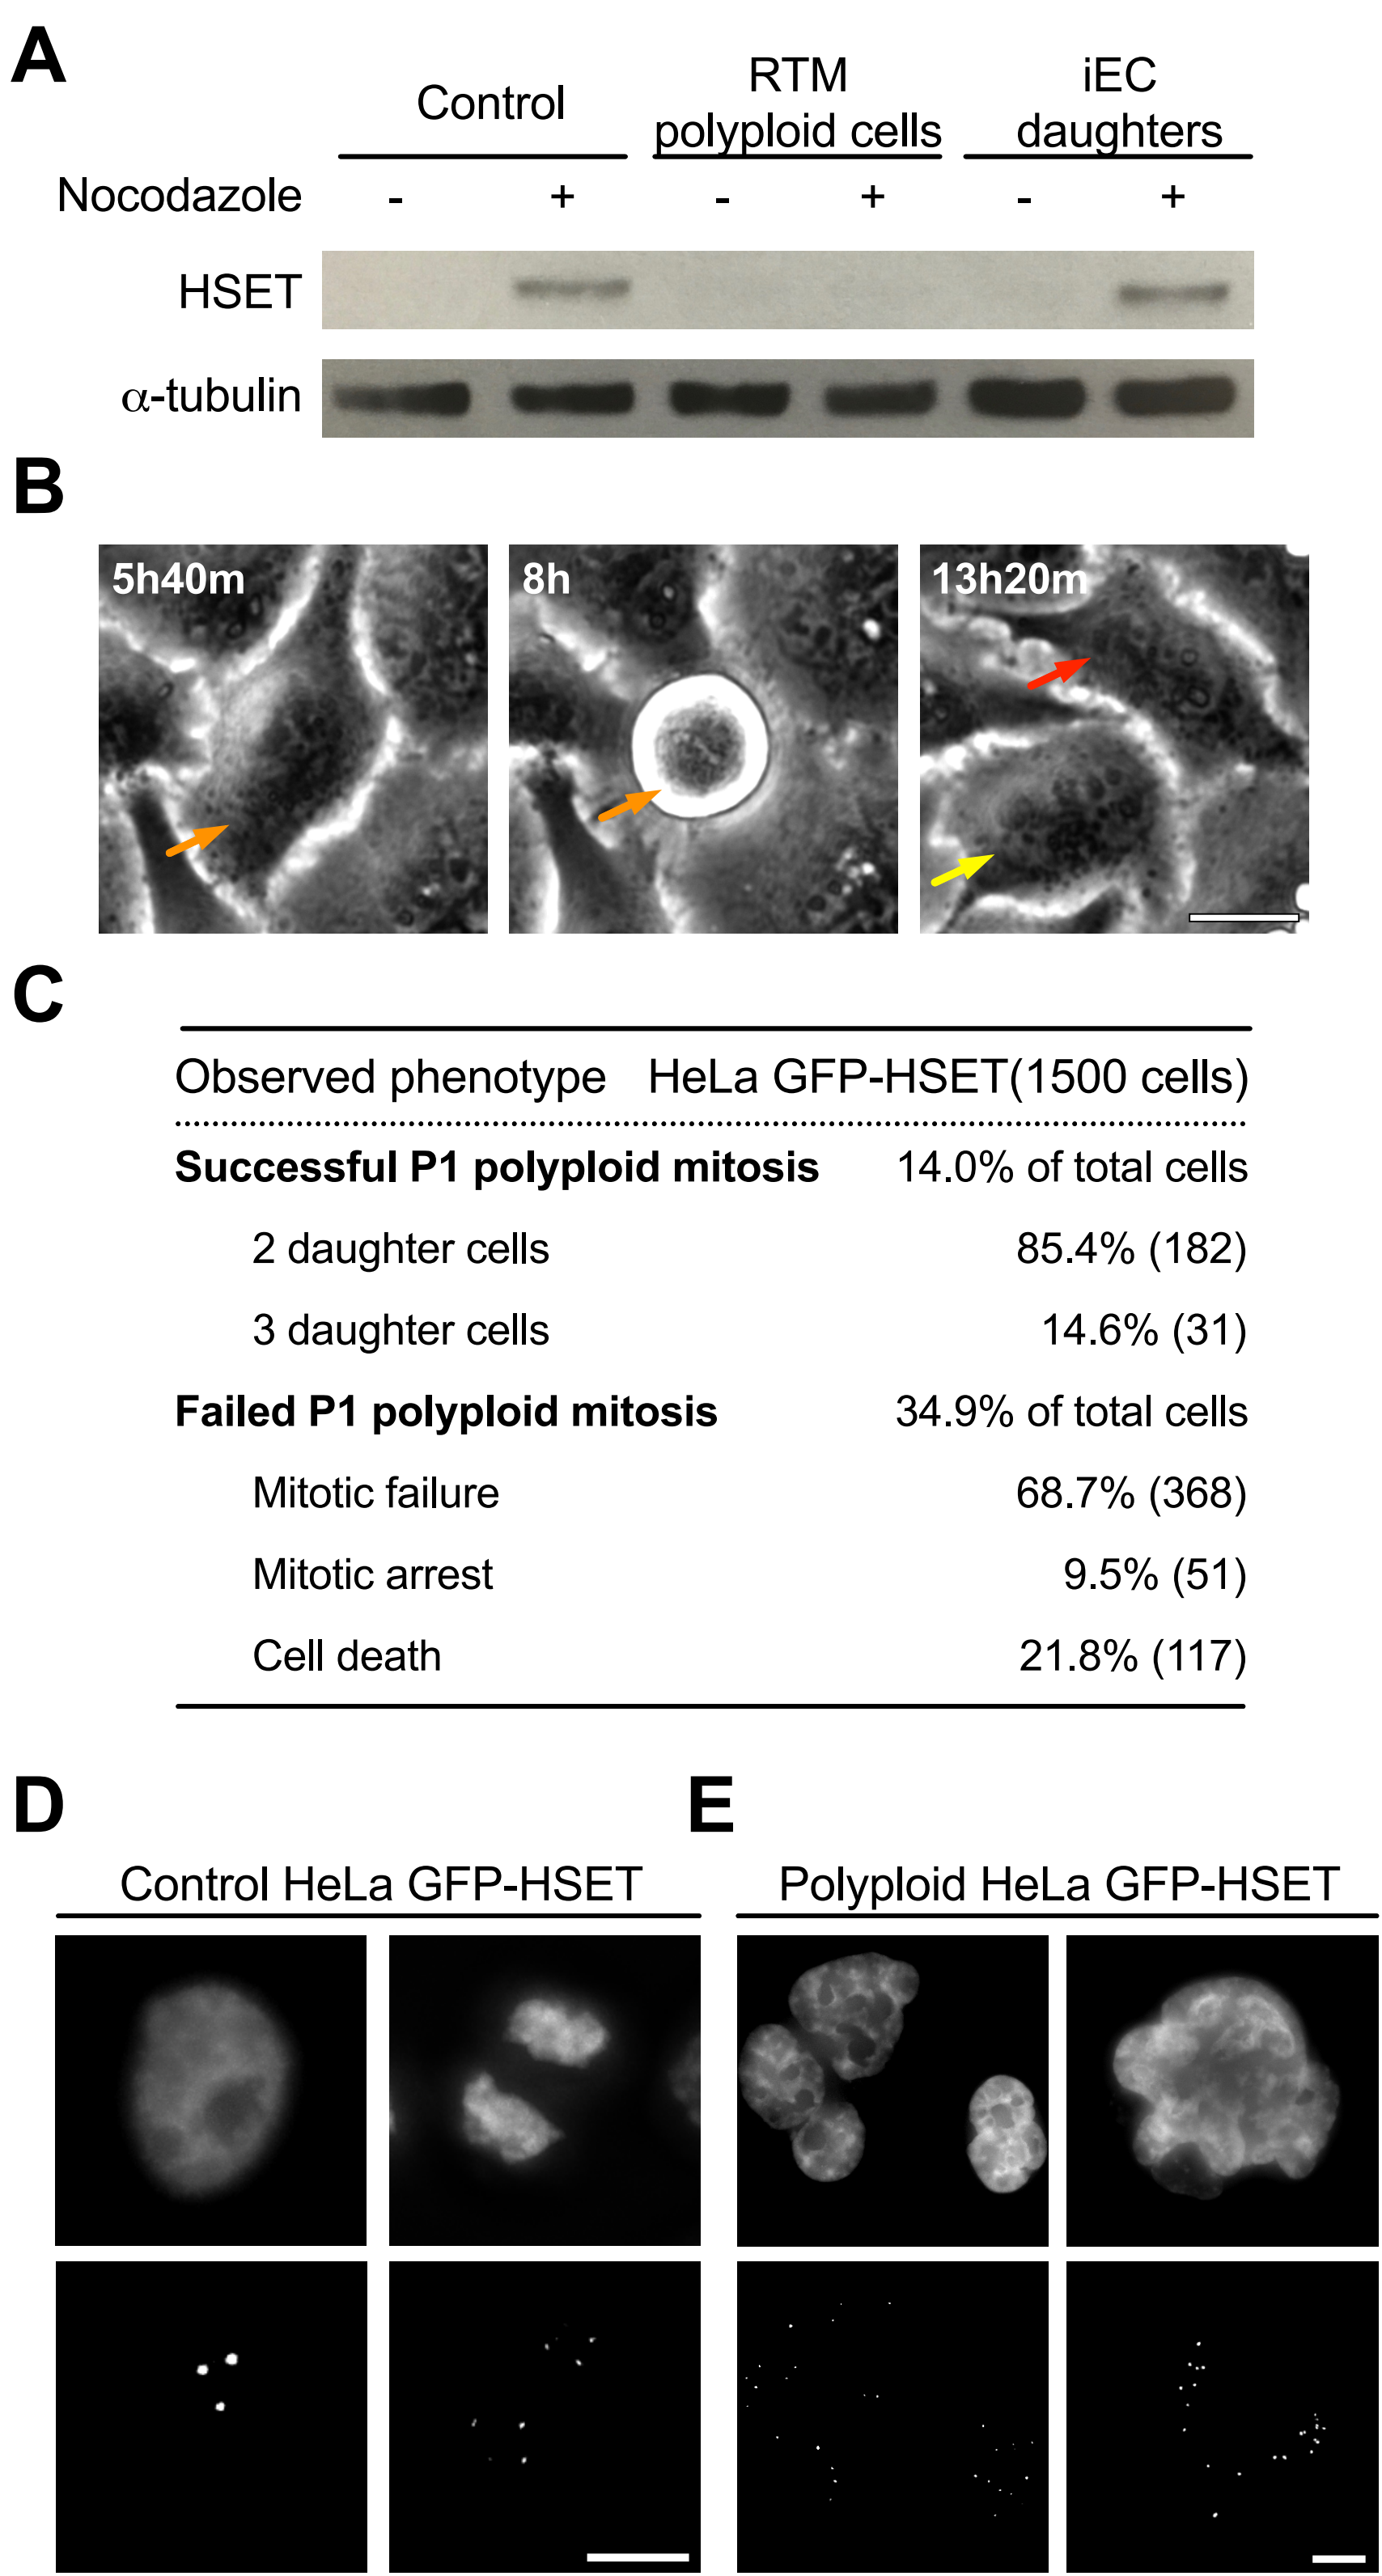

Supplement: supp_E16-03-0159v1_CombinedSupMats.pdf [file supp_E16-03-0159v1_CombinedSupMats.pdf]
